# Supplementary material for: Controls on microalgal community structures in cryoconite holes upon high-Arctic glaciers, Svalbard
Source: Copernicus journal article supplement (doi:10.5194/bg-13-659-2016), 2016-02-03
Supplement: Supplementary file 4 [file bg-13-659-2016-supplement.zip]

## Supplement B

**Table S1.** Previously described tardigrade and rotifer species or genera from cryoconites. Dominant species and their contribution to the population of tardigrades or rotifers are marked in bold and planktonic or predatory species are shown in brackets.

| Study                      | Genus/ species                                                             | Site                   |
|----------------------------|----------------------------------------------------------------------------|------------------------|
| Tardigrada                 |                                                                            |                        |
| Von Drygalski 1897         | <i>Macrobiotus hufelandi</i>                                               | Greenland, McMurdo (8) |
| Steinböck 1957             | Cf. <i>Macrobiotus</i> (predator)                                          | Alpes                  |
| Ramazotti 1968             | <i>Hypsibius janetscheki</i>                                               | Himalaya               |
|                            | <i>Hypsibius convergens</i>                                                | Himalaya               |
| Dastych 1985               | <i>Diaphascon recamieri</i>                                                | Svalbard               |
|                            | <i>Hypsibius dujardini</i>                                                 | Svalbard               |
|                            | <i>Hypsibius arcticus</i>                                                  | Svalbard               |
| De Smet and van Rompu 1994 | <i>Diphascon recamieri</i> (10%)                                           | Hyrnebreen (Svalbard)  |
|                            | <b><i>Isohypsibius granulifer</i> (90%)</b>                                | Hyrnebreen (Svalbard)  |
| Groongard et al., 1999     | <i>Diphascon scoticum</i>                                                  | Greenland              |
|                            | <i>Hypsibius arcticus</i>                                                  | Greenland              |
|                            | <i>Hypsibius dujardini</i>                                                 | Greenland              |
|                            | <i>Isohypsibius</i> sp.                                                    | Greenland              |
|                            | <b><i>Diphascon recamier i</i> (80-85%)</b>                                | Greenland              |
| Porazinska et al., 2004    | <i>Hypsibius</i> spp.                                                      | McMurdo (Antarctica)   |
|                            | <i>Acutuncus antarcticus</i>                                               | McMurdo (Antarctica)   |
| personal observation       | <i>Hypsibius convergens</i>                                                | Petunia (Svalbard)     |
|                            | <i>Diphascon recamieri</i>                                                 | Petunia (Svalbard)     |
|                            | <i>Isohypsibius granulifer</i>                                             | Petunia (Svalbard)     |
| Rotifera                   |                                                                            |                        |
| Von Drygalski 1897         | <i>Brachionus</i> sp.                                                      | Greenland              |
| Steinböck 1957             | <i>Philodina aculeata</i>                                                  | Alpes                  |
|                            | <i>Philodina reseolata</i>                                                 | Alpes                  |
| Gerdel Drouet 1960         | <i>Philodinavus paradoxus</i>                                              | Greenland              |
|                            | <i>Philodinavus paradoxus</i>                                              | Greenland              |
| De Smet and van Rompu 1994 | <b><i>Macrotrachella insolita</i> (99%)</b>                                | Hyrnebreen (Svalbard)  |
|                            | <i>Philodina acuticornis adiosa</i>                                        | Hyrnebreen (Svalbard)  |
|                            | <b><i>Dicranophorus permullis</i></b><br><b><i>permullis</i>(predator)</b> | Hyrnebreen (Svalbard)  |
|                            | <i>Encentrum mucronatum</i>                                                | Hyrnebreen (Svalbard)  |

**Table S1** (continued)

|                         |                                        |                       |
|-------------------------|----------------------------------------|-----------------------|
|                         | <i>Keratella cochleri</i> (plankton)   | Hyrnebreen (Svalbard) |
|                         | <i>Keratella quadrate</i> (plankton)   | Hyrnebreen (Svalbard) |
|                         | <i>Lecane clostocerca</i>              | Hyrnebreen (Svalbard) |
| Groongard et al., 1999  | <i>Philodina</i> cf. <i>roseola</i>    | Greenland             |
| Porazinska et al., 2004 | <i>Philodina gregaria</i>              | McMurdo (Antarctica)  |
|                         | <i>Cephalodella catellina</i>          | McMurdo (Antarctica)  |
| pers. observations      | <i>Adineta vaga</i>                    | Petunia (Svalbard)    |
|                         | <b><i>Macrotrachella musculosa</i></b> | Petunia (Svalbard)    |
|                         | <i>Ecentrum lutra</i> (predator)       | Petunia (Svalbard)    |

- 
- 1 Dastyh, H.: West Spitsbergen Tardigrada. Acta Zool. Cracov. 28, 169–214, 1985.  
2 De Smet, W.H., and Van Rompu, E.A.: Rotifera and Tardigrada from some cryoconite holes on a  
3 Spitsbergen (Svalbard) glacier. Belg. J. Zool. 124, 27–37, 2994.  
4 Gerdel, R.W., and Drouet, F.: The cryoconite of the Thule area, Greenland. Trans. Am. Microsc. Soc., 79,  
5 256–272, 1960.  
6 Grøngaard, A., Pugh, P.J.A., and McInnes, S.J.: Tardigrades, and other cryoconite biota, on the Greenland Ice  
7 Sheet. Zool. Anz., 238, 211–214, 1999.  
8 Porazinska, D.L., Fountain, A.G., Nylén, T.H., Tranter, M., Virginia, R.A., and Wall, D.H.: The biodiversity and  
9 biogeochemistry of cryoconite holes from McMurdo Dry Valley glaciers, Antarctica. Arct. Antarct. Alp.  
10 Res., 36, 84–91, 2004.  
11 Ramazzotti, G.: Tardigradi dei pozzetti glaciali di fusione (Kryokonitlöcher) dell’Himalaya. Khumbu  
12 Himalaya. Universitätsverlag., 3, 1–3, 1986.  
13 Steinböck, O.: Über Kryokonitlöcher under ihre biologische Bedeutung. Z. Gletsch. 24, 1–21, 1936.  
14 Von Drygalski, E.V. :Die Kryokonitlöcher. In Grönland, Expedition der Gesellschaft für Erdkunde zu  
15 Berlin 1891–1893: 93–103. Kuhl, W.H. (Ed.). Berlin: Herausgegen ex von dek, 1897.  
16  
17  
18  
19  
20  
21  
22  
23  
24  
25  
26

1 **Table S2.** Species and genera of microalgae, including cyanobacteria in previously found in Arctic cryoconites.  
2 Study 1: Kastovska et al. (2005), study 2: Mueller et al. (2001), study 3: Stibal et al. (2006), study 4: Uetake et  
3 al.(2010). Dominant species are marked in bold.

| Taxon                                                          | study |
|----------------------------------------------------------------|-------|
| <b>Chroococcales</b>                                           |       |
| <i>Chlorogloea</i> sp.                                         | 1     |
| <i>Chamaesiphon</i> sp.                                        | 3     |
| <b>Oscillatoriales</b>                                         |       |
| <b><i>Leptolyngbya</i> sp. long cells</b>                      | 1,2   |
| <i>Leptolyngbya</i> sp. short cells                            | 1     |
| <i>Leptolyngbya foveolarum</i> (Rabenh. ex Gom.) Anagn. & Kom. | 3     |
| <i>Leptolyngbya</i> cf. <i>notate</i>                          | 3     |
| <i>Lyngbya</i> spp.                                            | 2     |
| <i>Oscillatoria</i> spp.                                       | 2     |
| <i>Microcoleus</i> sp.                                         | 2     |
| <i>Microcoleus vaginatus</i> (Vauch.) Gom. Journ.              | 3     |
| <b><i>Phormidium</i> sp.</b>                                   | 1,2,3 |
| <i>Phormidium amoenum</i> (Kütz.) Anagn. & Kom                 | 3     |
| cf. <i>Pseudanabaena</i> sp.                                   | 1,3   |
| <i>Plectonema nostrocorum</i>                                  | 2     |
| <b>Nostocales</b>                                              |       |
| <i>Nostoc</i> sp.                                              | 2,3   |
| cf. <i>Scytonema</i>                                           | 2     |
| <i>Calothrix parietina</i>                                     | 2     |
| <b>Pseudoanabaenales</b>                                       |       |
| <i>Schizothrix</i> spp.                                        | 2     |
| <b>Chlorophyceae</b>                                           |       |
| <b><i>Chlorella</i> sp.</b>                                    | 1,3   |
| <i>Chlorella homeosphaera</i> (Skuja)                          | 1     |
| <i>Chlorella minutissima</i> (Fott & Novakova)                 | 1,3   |
| <i>Chlorella homosphaera</i> (Skuja)                           | 3     |
| <i>Chlorella vulgaris</i> Beij.                                | 3     |
| <i>Bracteacoccus</i> sp.                                       | 3     |
| <i>Trochiscia</i> sp.                                          | 3     |
| <b>Chlamydomonadales</b>                                       |       |
| cf. <i>Chlorococcum</i>                                        | 1,2   |
| <i>Coleochlamys cuccumis</i> (Reisigl) Ettl & Gaertner         | 1,2   |
| <i>Chlamydomonas</i> spp.                                      | 1,3   |
| <i>Chlamydomonas nivalis</i> (Bauer) Wille                     | 3     |
| cf. <i>Chloromonas</i>                                         | 2     |
| <i>Palmella</i> sp.                                            | 2     |
| <i>Protococcus nivalis</i> (Bauer)                             | 2     |

**Table S2(continued)**

## Oocystales

*Pseudococcomyxa simplex* Kors.

1

cf. *Pseudococcomyxa*

1

## Trebuxiophyceae

*Stichococcus bacillaris* Näg.

1,3

*Stichococcus* cf. *Chlorelloides*

1,3

cf. *Trochisciopsis*

1,3

*Muriella* sp.

3

*Muriella terrestris* J.B.Petersen

3

*Pseudococcomyxa simplex* Korsh.

3

## Klebsormidiales

***Klebsormidium* sp.**

1,3

*Klebsormidium flaccidum* (Kütz.) Silva, Mattox, Blackwell

1,3

## Tribophyceae

*Heterococcus* sp.

3

## Zygnematophyceae (=desmids)

*Cylindrocystis* sp.

1,2,3,4

*Cylindrocystis brebissonii*

2,4

*Mesotaenium berggrenii*

2,4

*Ancylonema nordenskiöldii*

4

## Bacillariophyceae (=diatoms)

unidentified

1,2

*Navicula* sp.

2

Pennate diatoms

3

Kaštovská, K., Elster, J., Stibal, M., and Šantrůčková, H.: Microbial assemblages in soil microbial succession after glacial retreat in Svalbard (High Arctic). *Microbial Ecology*, 50, 396-407, 2005.

Mueller, D.R., Vincent, W.F., Pollard, W.H., and Fritsen, C.H.: Glacial cryoconite ecosystems: a bipolar comparison of algal communities and habitats. *Nova Hedwigia Beiheft*, 123, 173-198, 2001.

Stibal, M., Šabacká, M., and Kaštovská, K.: Microbial communities on glacier surfaces in Svalbard: impact of physical and chemical properties on abundance and structure of cyanobacteria and microalgae. *Microbial ecology*, 52, 644-654, 2006.

Uetake, J., Naganuma, T., Bay Hebsgaard, M.B., and Kanda, H.: Communities of microalgae and cyanobacteria on glaciers in west Greenland. *Polar Science* 4, 71-80, 2010.

**Table S3.** Description of the abbreviations used for the sampling sites and their geographical location in gps coordinates and altitude (error 25m). Each ID represents one cryoconite, if a cryoconite is sampled several times the number is added (eg. NC1.1, NC1.2...). The main sites (eg. Hørbye main) are the sites with repeated sampling over the season. The moraine is located in front of Nordenskiöldbreen. Hørbye transect are additional samples on Hørbyebreen in order to get variation in the altitudes. All samples of Hørbyebreen are summarized as HC for the analysis in the paper.

| ID   | site               | glacier           | latitude   | longitude  | error (m) | altitude (m) |
|------|--------------------|-------------------|------------|------------|-----------|--------------|
| E1   | Ebbabreen          | Ebbabreen         | 78°43.695N | 16°51.440E | 10        | 260          |
| E2   | Ebbabreen          | Ebbabreen         | 78°43.823N | 16°52.458E | 10        | 306          |
| E3   | Ebbabreen          | Ebbabreen         | 78°44.072N | 16°52.836E | 10        | 356          |
| E4   | Ebbabreen          | Ebbabreen         | 78°44.499N | 16°54.630E | 10        | 525          |
| E5   | Ebbabreen          | Ebbabreen         | 78°43.866N | 16°51.268E | 10        | 286          |
| E6   | Ebbabreen          | Ebbabreen         | 78°43.730N | 16°48.827E | 10        | 160          |
| HC1  | Hørbye main        | Hørbyebreen       | 78°45.417N | 16°19.533E | 10        | 230          |
| HC2  | Hørbye main        | Hørbyebreen       | 78°45.414N | 16°19.536E | 10        | 230          |
| HC3  | Hørbye main        | Hørbyebreen       | 78°45.414N | 16°19.5E   | 10        | 230          |
| HC4  | Hørbye main        | Hørbyebreen       | 78°45.521N | 16°19.521E | 10        | 230          |
| HC5  | Hørbye main        | Hørbyebreen       | 78°45.413N | 16°19.507E | 10        | 230          |
| HC6  | Hørbye main        | Hørbyebreen       | 78°45.414N | 16°19.475E | 10        | 230          |
| HC7  | Hørbye main        | Hørbyebreen       | 78°45.412N | 16°19.46E  | 10        | 230          |
| HC8  | Hørbye main        | Hørbyebreen       | 78°45.419N | 16°19.38E  | 10        | 230          |
| HC9  | Hørbye main        | Hørbyebreen       | 78°45.418N | 16°19.345E | 10        | 230          |
| HC10 | Hørbye main        | Hørbyebreen       | 78°45.428N | 16°19.462E | 10        | 230          |
| HT1  | Hørbye transect    | Hørbyebreen       | 78°45.255N | 16°19.950E | 10        | 224          |
| HT2  | Hørbye transect    | Hørbyebreen       | 78°45.642N | 16°17.745E | 10        | 290          |
| HT3  | Hørbye transect    | Hørbyebreen       | 78°46.090N | 16°13.926E | 10        | 398          |
| HT4  | Hørbye transect    | Hørbyebreen       | 78°45.847N | 16°15.555E | 10        | 346          |
| HT5  | Hørbye transect    | Hørbyebreen       | 78°45.255N | 16°20.597E | 10        | 170          |
| HT6  | Hørbye transect    | Hørbyebreen       | 78°45.282N | 16°14.441E | 10        | 370          |
| NC1  | Nordenskiöld main  | Nordenskiöldbreen | 78°38.336N | 16°59.346E | 10        | 150          |
| NC2  | Nordenskiöld main  | Nordenskiöldbreen | 78°38.336N | 16°59.351E | 10        | 150          |
| NC3  | Nordenskiöld main  | Nordenskiöldbreen | 78°38.325N | 16°59.493E | 10        | 150          |
| NC4  | Nordenskiöld main  | Nordenskiöldbreen | 78°38.327N | 16°59.38E  | 10        | 150          |
| NC5  | Nordenskiöld main  | Nordenskiöldbreen | 78°38.299N | 16°59.469E | 10        | 150          |
| NC6  | Nordenskiöld main  | Nordenskiöldbreen | 78°38.296N | 16°59.466E | 10        | 150          |
| NC7  | Nordenskiöld main  | Nordenskiöldbreen | 78°38.312N | 16°59.396E | 10        | 150          |
| NC8  | Nordenskiöld main  | Nordenskiöldbreen | 78°38.313N | 16°59.34E  | 10        | 150          |
| NC9  | Nordenskiöld main  | Nordenskiöldbreen | 78°38.331N | 16°59.384E | 10        | 150          |
| NC10 | Nordenskiöld main  | Nordenskiöldbreen | 78°38.339N | 16°59.351E | 10        | 150          |
| NR1  | Retretørya         | Nordenskiöldbreen | 78°39.4N   | 16°56.514E | 50        | 50           |
| NR2  | Retretørya         | Nordenskiöldbreen | 78°39.368N | 16°56.514E | 50        | 50           |
| NR3  | Retretørya         | Nordenskiöldbreen | 78°39.3N   | 16°56E     | 50        | 50           |
| NR4  | Retretørya         | Nordenskiöldbreen | 78°39N     | 16°57E     | 150       | 20           |
| NR5  | Retretørya         | Nordenskiöldbreen | 78°39.368N | 16°56.514E | 10        | 50           |
| NR6  | Retretørya         | Nordenskiöldbreen | 78°39.3N   | 16°56E     | 50        | 50           |
| NI1  | Nordenskiöld inner | Nordenskiöldbreen | 78°39.103N | 17°03.306E | 10        | 200          |
| NI2  | Nordenskiöld inner | Nordenskiöldbreen | 78°39.063N | 17°03.196E | 10        | 200          |
| NI3  | Nordenskiöld inner | Nordenskiöldbreen | 78°39N     | 17°03.2E   | 100       | 200          |
| NI4  | Nordenskiöld inner | Nordenskiöldbreen | 78°39N     | 17°03.2E   | 100       | 200          |

**Table S3** (continued)

|     |                    |                   |            |            |     |     |
|-----|--------------------|-------------------|------------|------------|-----|-----|
| NI5 | Nordenskiöld inner | Nordenskiöldbreen | 78°39N     | 17°03.2E   | 100 | 200 |
| NI6 | Nordenskiöld inner | Nordenskiöldbreen | 78°39.103N | 17°03.344E | 10  | 200 |
| NL1 | Nordenskiöld lake  | Nordenskiöldbreen | 78°39.250N | 17°03.744E | 10  | 200 |
| NL2 | Nordenskiöld lake  | Nordenskiöldbreen | 78°38.892N | 17°02.521E | 10  | 200 |
| NL3 | Nordenskiöld lake  | Nordenskiöldbreen | 78°38.89N  | 17°02.52E  | 25  | 200 |
| NL4 | Nordenskiöld lake  | Nordenskiöldbreen | 78°39.103N | 17°03.393E | 10  | 200 |
| NL5 | Nordenskiöld lake  | Nordenskiöldbreen | 78°39N     | 17°03.4E   | 50  | 200 |
| NL6 | Nordenskiöld lake  | Nordenskiöldbreen | 78°39.2N   | 17°03.4E   | 50  | 200 |

1

2

3

4

5

6

7

8

9

10

11

**Table S4.** Environmental impacts on each sampling site. Remarks give special properties of the sample: a normal hole is considered as a cylindrical cryoconite between 10 and 40 cm long in diameter with cryoconite granules on the bottom, bigger holes are considered as ponds, precipitate is mainly iron precipitation on the granules, crevasse formed holes are within crevasses and formed by different processes, segmented holes are multiple holes connected by a shared water surface, V-shaped holes were typical for the supraglacial lake, proglacial ponds are either fed by glacier melt or moraine melt. Bird impacts are ranked between 0 (no impact) and 3 (high impact) depending on birds observed in the area, distances of bird colonies and the sea and observed resting places on the glacier, including their remains (carcasses, guano). The observed animals are F: Northern fulmar (*Fulmarus glacialis*), G: Glaucous gull (*Larus hyperboreus*), I: ivory gull (*Pagophila eburnea*), K: black-legged kittiwake (*Rissa tridactyla*) and A: Arctic terns (*Sterna paradisaea*). The letters are sorted after their numbers of observations. Additionally, polar bears (*Ursus maritimus*) (P) were observed on one location (NR). The vegetation near the glacier is either moss (M) *Nostoc* mats (N) or the higher plant *Saxifraga oppositifolia* (S). The sediment cover is ranked between 0 (all sediments trapped in cryoconites) and 3 (high sediment cover on the glacier surface). The system is given as a code of the bigger hydrological system in the first three letters: Eba: Ebbabreen, Hor: Hørbyebreen, Nor: Nordenskiöldbreen, Ret: Retrettøya, Lak: supraglacial lake on Nordenskiöldbreen and mor: proglacial moraine. The last letter indicates whether the holes are directly connected by meltwater flow. The closest sediment source (closest sed) indicates the closest source of locally borne, aeolian or meltwater transported sediments for the cryoconites. It is either moraines originating from nunataks (nunatak mor), moraines originating from adjacent slopes (slope mor), the glacier margin as moraine or peninsula (margin mor/penin), possible subglacial origin due to seasonal upwelling processes (subgl?) or from the proglacial moraines (moraine). The distance to the closest slope as source of new input of sediments and biota and the distance to the sea as a source of nutrients and organisms is given in m (error 100 m).

| ID  | Remarks      | Bird impact | Birds observed | veg nearby | sed cover | System | Closest sed | Slope dist (m) | Sea dist (m) |
|-----|--------------|-------------|----------------|------------|-----------|--------|-------------|----------------|--------------|
| E1  | normal       | 1           |                |            | 2         | EbaA   | nunatak mor | 100            | 6000         |
| E2  | normal       | 1           |                |            | 2         | EbaB   | nunatak mor | 150            | 6400         |
| E3  | pond         | 1           |                |            | 2         | EbaC   | nunatak mor | 600            | 6700         |
| E4  | normal       | 0           |                |            | 1         | EbaD   | nunatak mor | 1400           | 7600         |
| E5  | precipitates | 2           | F,G            |            | 3         | EbaE   | slope mor   | 50             | 6100         |
| E6  | normal       | 2           | F,G            |            | 3         | EbaF   | slope mor   | 100            | 5250         |
| HC1 | normal       | 0           |                | M,N        | 3         | HorA   | slope mor   | 400            | 6150         |
| HC2 | normal       | 0           |                | M,N        | 3         | HorA   | slope mor   | 400            | 6150         |
| HC3 | normal       | 0           |                | M,N        | 3         | HorA   | slope mor   | 400            | 6150         |
| HC4 | normal       | 0           |                | M,N        | 3         | HorA   | slope mor   | 400            | 6150         |
| HC5 | normal       | 0           |                | M,N        | 3         | HorA   | slope mor   | 400            | 6150         |
| HC6 | normal       | 0           |                | M,N        | 3         | HorA   | slope mor   | 400            | 6150         |
| HC7 | normal       | 0           |                | M,N        | 3         | HorB   | slope mor   | 400            | 6150         |
| HC8 | normal       | 0           |                | M,N        | 3         | HorC   | slope mor   | 400            | 6150         |
| HC9 | normal       | 0           |                | M,N        | 3         | HorD   | slope mor   | 400            | 6150         |

**Table S4** (cont.)

|      |               |   |         |   |      |              |      |      |
|------|---------------|---|---------|---|------|--------------|------|------|
| HC10 | normal        | 0 | M,N     | 3 | HorE | slope mor    | 400  | 6150 |
| HT1  | normal        | 0 | N       | 3 | HorF | slope mor    | 300  | 5900 |
| HT2  | normal        | 0 |         | 3 | HorG | slope mor    | 500  | 6750 |
| HT3  | normal        | 0 |         | 3 | HorH | slope mor    | 350  | 8300 |
| HT4  | normal        | 0 | N       | 3 | HorI | slope mor    | 400  | 7600 |
| HT5  | normal        | 1 | M,N     | 3 | HorJ | margin mor   | 20   | 5650 |
| HT6  | normal        | 0 | N       | 2 | HorK | slope mor    | 230  | 7800 |
| NC1  | normal        | 2 | I,K,A,F | 1 | NorA | nunatak mor  | 850  | 800  |
| NC2  | normal        | 2 | I,K,A,F | 1 | NorA | nunatak mor  | 850  | 800  |
| NC3  | normal        | 2 | I,K,A,F | 1 | NorB | nunatak mor  | 850  | 800  |
| NC4  | normal        | 2 | I,K,A,F | 1 | NorC | nunatak mor  | 850  | 800  |
| NC5  | normal        | 2 | I,K,A,F | 1 | NorD | nunatak mor  | 850  | 800  |
| NC6  | normal        | 2 | I,K,A,F | 1 | NorE | nunatak mor  | 850  | 800  |
| NC7  | normal        | 2 | I,K,A,F | 1 | NorF | nunatak mor  | 850  | 800  |
| NC8  | normal        | 2 | I,K,A,F | 1 | NorG | nunatak mor  | 850  | 800  |
| NC9  | normal        | 2 | I,K,A,F | 1 | NorH | nunatak mor  | 850  | 800  |
| NC10 | normal        | 2 | I,K,A,F | 1 | NorA | nunatak mor  | 850  | 800  |
| NR1  | crev. & prec. | 3 | A,K     | 1 | RetA | margin penin | 150  | 150  |
| NR2  | crevasse      | 3 | A,K     | 1 | RetB | margin penin | 150  | 150  |
| NR3  | precipitates  | 3 | A,K     | 1 | RetC | margin penin | 150  | 150  |
| NR4  | normal        | 3 | A,K     | 1 | RetD | margin penin | 50   | 50   |
| NR5  | normal        | 3 | A,K     | 1 | RetA | margin penin | 150  | 150  |
| NR6  | normal        | 3 | A,K     | 1 | RetC | margin penin | 150  | 150  |
| NI1  | normal        | 1 |         | 0 | NorI | nunatak mor  | 2800 | 1800 |
| NI2  | normal        | 1 |         | 0 | NorJ | nunatak mor  | 2800 | 1800 |
| NI3  | normal        | 1 |         | 0 | NorK | nunatak mor  | 2800 | 1800 |
| NI4  | normal        | 1 |         | 0 | NorL | nunatak mor  | 2800 | 1800 |



**Table S4** (cont.)

|     |           |   |   |      |                 |      |      |
|-----|-----------|---|---|------|-----------------|------|------|
| NI5 | normal    | 1 | 0 | NorN | nunatak mor     | 2800 | 1800 |
| NI6 | pond      | 1 | 0 | NorO | nunatak mor     | 2800 | 1800 |
| NL1 | segmented | 1 | 0 | LakA | nunatak/ subgl? | 3300 | 2000 |
| NL2 | V-shaped  | 1 | 0 | LakB | nunatak/ subgl? | 3300 | 2000 |
| NL3 | V-shaped  | 1 | 0 | LakB | nunatak/ subgl? | 3300 | 2000 |
| NL4 | V-shaped  | 1 | 0 | LakB | nunatak/ subgl? | 3300 | 2000 |
| NL5 | normal    | 1 | 0 | LakC | nunatak/ subgl? | 3300 | 2000 |
| NL6 | V-shaped  | 1 | 0 | LakD | nunatak/ subgl? | 3300 | 2000 |

1  
2  
3  
4  
5  
6  
7  
8  
9  
10  
11  
12  
13  
14  
15  
16  
17  
18  
19  
20  
21  
22

**Table S5** Abundances of the main invertebrates (ind. g<sup>-1</sup> dw<sup>-1</sup>.) and microalgae (cm<sup>3</sup> g<sup>-1</sup> dw<sup>-1</sup>) x 10<sup>6</sup>. and the mean values and standard deviations for each site and for all cryoconites.

| ID             | Tardigrades   | Bdelloids    | Oscillatoriales | Chlorococcales | Zygnemales   | coc_cyano      |
|----------------|---------------|--------------|-----------------|----------------|--------------|----------------|
| E5             | 623.70        | 33.58        | 638.19          | 309.50         | 93.77        | 23.44          |
| E6             | 67.82         | 11.30        | 215.43          | 0.00           | 28.58        | 38.77          |
| <b>E mean</b>  | <b>345.76</b> | <b>22.44</b> | <b>426.81</b>   | <b>154.75</b>  | <b>61.18</b> | <b>31.10</b>   |
| <b>E sd</b>    | <b>393.06</b> | <b>15.75</b> | <b>298.94</b>   | <b>218.85</b>  | <b>46.09</b> | <b>10.84</b>   |
| HC1.2          | 4.05          | 4.05         | 710.21          | 27.77          | 0.00         | 910.56         |
| HC1.3          | 8.96          | 2.24         | 780.91          | 63.47          | 0.00         | 2280.50        |
| HC1.4          | 11.30         | 5.65         | 513.85          | 159.49         | 0.00         | 758.77         |
| HC2.2          | 2.53          | 30.36        | 824.88          | 119.23         | 0.00         | 2489.54        |
| HC2.4          | 9.31          | 23.26        | 290.56          | 89.46          | 97.62        | 990.08         |
| HC3.4          | 0.00          | 0.00         | 1032.30         | 62.89          | 91.60        | 988.28         |
| HC4.2          | 7.25          | 19.34        | 751.10          | 112.20         | 109.27       | 1439.78        |
| HC4.3          | 57.91         | 72.38        | 334.34          | 81.97          | 101.20       | 2119.92        |
| HC4.4          | 0.00          | 10.12        | 470.52          | 26.75          | 24.32        | 714.69         |
| HC5.4          | 63.97         | 12.18        | 2350.19         | 112.29         | 47.02        | 1687.62        |
| HC6.4          | 28.64         | 17.19        | 1587.47         | 35.07          | 183.81       | 2499.32        |
| HC7.2          | 6.27          | 8.78         | 80.61           | 59.85          | 58.39        | 136.91         |
| HC7.3          | 6.81          | 13.62        | 177.05          | 1.11           | 125.77       | 740.82         |
| HC7.4          | 39.34         | 43.27        | 277.14          | 18.83          | 324.79       | 642.52         |
| HC8.4          | 64.28         | 6.89         | 1187.43         | 80.77          | 66.71        | 2525.72        |
| HC9.4          | 6.73          | 0.00         | 412.83          | 293.94         | 115.56       | 793.49         |
| HC10.2         | 2.60          | 33.81        | 857.02          | 187.59         | 264.84       | 1293.68        |
| H10.4          | 31.18         | 15.59        | 679.80          | 68.76          | 71.40        | 1684.51        |
| <b>HC mean</b> | <b>19.51</b>  | <b>17.71</b> | <b>739.90</b>   | <b>88.97</b>   | <b>93.46</b> | <b>1372.04</b> |
| <b>HC sd</b>   | <b>21.83</b>  | <b>17.64</b> | <b>536.82</b>   | <b>68.55</b>   | <b>87.31</b> | <b>728.33</b>  |
| HT1            | 12.45         | 6.22         | 360.77          | 36.56          | 34.99        | 1138.24        |
| HT3            | 18.92         | 30.74        | 782.36          | 255.99         | 42.53        | 768.37         |
| HT4            | 39.25         | 36.23        | 201.81          | 644.65         | 9.34         | 394.43         |
| HT5            | 10.14         | 25.36        | 462.28          | 14.62          | 0.00         | 624.07         |
| <b>HT mean</b> | <b>23.54</b>  | <b>24.40</b> | <b>448.31</b>   | <b>312.40</b>  | <b>28.95</b> | <b>767.01</b>  |
| <b>HT sd</b>   | <b>13.24</b>  | <b>13.06</b> | <b>245.06</b>   | <b>292.21</b>  | <b>20.29</b> | <b>311.96</b>  |
| NC1.1          | 7.60          | 22.22        | 193.04          | 192.10         | 0.00         | 160.72         |
| NC1.3          | 23.49         | 11.75        | 599.98          | 881.81         | 22.09        | 569.33         |
| NC1.4          | 21.44         | 60.02        | 1146.45         | 294.69         | 196.89       | 441.18         |
| NC2.1          | 4.64          | 3.55         | 644.81          | 306.48         | 0.00         | 86.45          |
| NC2.4          | 36.27         | 32.98        | 486.91          | 92.43          | 89.13        | 394.49         |
| NC3.1          | 82.37         | 10.15        | 389.62          | 52.47          | 3.76         | 51.86          |
| NC3.3          | 237.50        | 118.75       | 154.13          | 217.09         | 953.02       | 244.04         |

Table S5 (cont.)

|                   |               |              |               |               |               |               |
|-------------------|---------------|--------------|---------------|---------------|---------------|---------------|
| NC3.4             | 214.51        | 83.18        | 641.00        | 454.10        | 292.14        | 592.03        |
| NC4.1             | 14.45         | 6.49         | 1083.55       | 164.08        | 0.79          | 1526.34       |
| NC5.1             | 1.57          | 5.50         | 679.87        | 123.34        | 0.90          | 256.69        |
| NC5.2             | 19.35         | 45.15        | 586.05        | 137.42        | 24.54         | 63.34         |
| NC5.3             | 5.38          | 2.69         | 675.03        | 0.00          | 8.37          | 432.33        |
| NC5.4             | 13.84         | 17.80        | 668.18        | 430.77        | 20.33         | 399.33        |
| NC6.1             | 40.97         | 49.16        | 21.04         | 0.00          | 0.05          | 35.22         |
| NC6.3             | 102.09        | 79.04        | 262.96        | 0.00          | 245.51        | 386.23        |
| NC6.4             | 170.20        | 30.39        | 102.16        | 53.96         | 35.53         | 303.69        |
| NC7.1             | 1.64          | 4.92         | 99.73         | 0.00          | 0.00          | 25.50         |
| NC8.1             | 0.00          | 12.93        | 267.59        | 51.37         | 0.00          | 149.81        |
| NC9.1             | 61.18         | 80.01        | 365.47        | 19.22         | 0.63          | 12.04         |
| NC9.2             | 21.58         | 21.58        | 204.68        | 210.39        | 66.21         | 146.34        |
| NC9.3             | 62.59         | 46.94        | 709.42        | 719.85        | 34.86         | 437.92        |
| NC9.4             | 167.48        | 83.74        | 263.56        | 634.37        | 76.98         | 145.76        |
| NC10.1            | 23.84         | 57.22        | 303.56        | 4.44          | 0.00          | 169.65        |
| <b>NC mean</b>    | <b>58.00</b>  | <b>38.53</b> | <b>458.64</b> | <b>219.15</b> | <b>90.08</b>  | <b>305.66</b> |
| <b>NC sd</b>      | <b>71.62</b>  | <b>32.95</b> | <b>301.25</b> | <b>249.79</b> | <b>205.42</b> | <b>319.56</b> |
| NI2               | 8.87          | 44.35        | 777.42        | 99.74         | 47.73         | 125.92        |
| NI3               | 16.59         | 31.11        | 154.97        | 37.32         | 50.80         | 35.59         |
| NI4               | 0.00          | 5.01         | 529.43        | 0.00          | 17.25         | 29.07         |
| NI6               | 33.77         | 42.21        | 86.01         | 47.37         | 0.00          | 49.74         |
| <b>NI mean</b>    | <b>14.81</b>  | <b>30.67</b> | <b>386.96</b> | <b>46.11</b>  | <b>28.94</b>  | <b>60.08</b>  |
| <b>NI sd</b>      | <b>14.34</b>  | <b>18.06</b> | <b>325.14</b> | <b>41.15</b>  | <b>24.53</b>  | <b>44.73</b>  |
| NL1               | 75.00         | 33.33        | 131.31        | 344.73        | 0.00          | 127.91        |
| NL4               | 6.79          | 3.40         | 114.90        | 235.64        | 314.81        | 13.78         |
| NL5               | 0.00          | 14.27        | 1041.66       | 49.88         | 62.64         | 57.86         |
| NL6               | 0.00          | 6.29         | 407.03        | 72.72         | 104.68        | 105.92        |
| <b>NL mean</b>    | <b>20.45</b>  | <b>14.32</b> | <b>423.73</b> | <b>175.74</b> | <b>120.53</b> | <b>76.37</b>  |
| <b>NL sd</b>      | <b>36.51</b>  | <b>13.48</b> | <b>433.20</b> | <b>139.76</b> | <b>136.48</b> | <b>50.96</b>  |
| NR1               | 0.00          | 6.97         | 71.97         | 907.31        | 193.08        | 36.24         |
| NR2               | 14.33         | 39.82        | 46.17         | 328.48        | 391.92        | 38.55         |
| NR3               | 24.24         | 27.70        | 26.75         | 378.83        | 343.33        | 43.63         |
| NR4               | 17.45         | 54.85        | 515.10        | 647.59        | 185.55        | 398.72        |
| NR6               | 60.49         | 194.90       | 31.89         | 45.50         | 250.12        | 95.80         |
| <b>NR mean</b>    | <b>23.30</b>  | <b>64.85</b> | <b>138.37</b> | <b>461.54</b> | <b>272.80</b> | <b>122.59</b> |
| <b>NR sd</b>      | <b>22.59</b>  | <b>74.78</b> | <b>211.32</b> | <b>328.24</b> | <b>91.71</b>  | <b>156.30</b> |
| <b>total mean</b> | <b>72.19</b>  | <b>30.42</b> | <b>431.82</b> | <b>208.38</b> | <b>99.42</b>  | <b>390.69</b> |
| <b>total sd</b>   | <b>114.72</b> | <b>18.14</b> | <b>208.81</b> | <b>134.48</b> | <b>163.19</b> | <b>477.57</b> |

1

2

1 **Table S6** total organic carbon (TOC) and total inorganic carbon (TIC) analysis, using an elemental analyzer  
 2 for Nordenskiöldbreen (NR) and Hørbyebreen (HC)

| Group Name | Vials | Replicates | Rejected | Date and time    | TOC (ppb) | IC (ppb) | TC (ppb) | Oxidizer Rate |
|------------|-------|------------|----------|------------------|-----------|----------|----------|---------------|
| NR01       | 1     | 1          | Y        | 04.11.2014 14:57 | 2270      | 641      | 2910     | 0.4           |
| NR01       | 1     | 2          | N        | 04.11.2014 15:01 | 2290      | 637      | 2930     | 0.4           |
| NR01       | 1     | 3          | N        | 04.11.2014 15:05 | 2300      | 634      | 2930     | 0.4           |
| NR03       | 2     | 1          | Y        | 04.11.2014 15:32 | 2850      | 648      | 3500     | 0.6           |
| NR03       | 2     | 2          | N        | 04.11.2014 15:36 | 2850      | 643      | 3490     | 0.6           |
| NR03       | 2     | 3          | N        | 04.11.2014 15:40 | 2850      | 644      | 3490     | 0.6           |
| NR08       | 3     | 1          | Y        | 04.11.2014 16:08 | 2520      | 773      | 3290     | 0.5           |
| NR08       | 3     | 2          | N        | 04.11.2014 16:12 | 2520      | 764      | 3280     | 0.5           |
| NR08       | 3     | 3          | N        | 04.11.2014 16:16 | 2520      | 758      | 3280     | 0.5           |
| NR09       | 4     | 1          | Y        | 04.11.2014 16:43 | 2870      | 691      | 3560     | 0.6           |
| NR09       | 4     | 2          | N        | 04.11.2014 16:47 | 2870      | 691      | 3560     | 0.6           |
| NR09       | 4     | 3          | N        | 04.11.2014 16:51 | 2870      | 689      | 3560     | 0.6           |
| NR04       | 5     | 1          | Y        | 04.11.2014 17:19 | 1590      | 2030     | 3620     | 0.3           |
| NR04       | 5     | 2          | N        | 04.11.2014 17:23 | 1570      | 1970     | 3540     | 0.3           |
| NR04       | 5     | 3          | N        | 04.11.2014 17:27 | 1560      | 1970     | 3530     | 0.3           |
| HR06       | 6     | 1          | Y        | 04.11.2014 17:54 | 4330      | 624      | 4950     | 0.9           |
| HR06       | 6     | 2          | N        | 04.11.2014 17:58 | 4290      | 623      | 4910     | 0.9           |
| HR06       | 6     | 3          | N        | 04.11.2014 18:02 | 4240      | 620      | 4860     | 0.9           |

| AVG  | IC (ppb)   | TC (ppb)   | STD | TOC (ppb)   | IC (ppb)   | TC (ppb)   |
|------|------------|------------|-----|-------------|------------|------------|
| NR01 | 637.333333 | 2923.33333 |     | 15.27525232 | 3.51188458 | 11.5470054 |
| NR03 | 645        | 3493.33333 |     | 0           | 2.64575131 | 5.77350269 |
| NR08 | 765        | 3283.33333 |     | 0           | 7.54983444 | 5.77350269 |
| NR09 | 690.333333 | 3560       |     | 0           | 1.15470054 | 0          |
| NR04 | 1990       | 3563.33333 |     | 15.27525232 | 34.6410162 | 49.3288286 |
| HR06 | 622.333333 | 4906.66667 |     | 45.09249753 | 2.081666   | 45.0924975 |

3 TOC total organic carbon (dissolved)  
 4 IC inorganic carbon  
 5 TC total carbon  
 6 ppm parts per million  
 7  
 8  
 9  
 10  
 11  
 12  
 13  
 14

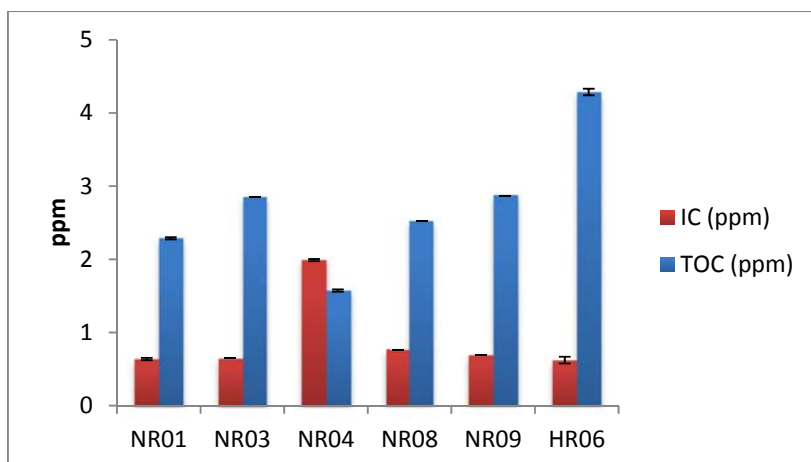

**Figure S1.** Organic (TOC) and inorganic (TIC) carbon analysis results for Nordenskiöldbreen (NR) and Hørbye-breen (HR). The error bars indicate the standard deviation of technical replicates.

**Table S7.** Results for nutrient analysis of sediments in mg/kg (top) and mmol/kg (bottom) and relevant ratios of particulate nutrients. P-PO<sub>4</sub>: bioavailable phosphate, TP: total phosphate, TN: total nitrogen, TC: total Carbon, OM: organic matter.

| Sample<br>ident. | P-PO <sub>4</sub><br>mg/kg | TP<br>mg/kg <sup>-1</sup> | TN<br>Mg kg <sup>-1</sup> | TN : TP | P-PO <sub>4</sub> : TP | TC : TN |
|------------------|----------------------------|---------------------------|---------------------------|---------|------------------------|---------|
| H1               | 18.32                      | 727.69                    | 1127.73                   | 1.55    | 0.03                   | 0.09    |
| H2               | 24.23                      | 618.77                    | 1830.42                   | 2.96    | 0.04                   | 0.05    |
| H3               | 17.85                      | 594.73                    | 1647.54                   | 2.77    | 0.03                   | 0.06    |
| N1               | 19.52                      | 531.16                    | 1924.18                   | 3.62    | 0.04                   | 0.05    |
| N2               | 13.50                      | 570.70                    | 1447.58                   | 2.54    | 0.02                   | 0.07    |
| N3               | 8.74                       | 806.29                    | 264.38                    | 0.33    | 0.01                   | 0.38    |
| N4               | 16.75                      | 414.71                    | 1630.93                   | 3.93    | 0.04                   | 0.06    |
| N5               | 17.90                      | 463.30                    | 1525.84                   | 3.29    | 0.04                   | 0.06    |
| N6               | 18.68                      | 518.94                    | 1876.06                   | 3.62    | 0.04                   | 0.05    |

  

| Sample<br>ID | Sample<br>my ID | OM<br>% d w | water content<br>% weight | P-PO <sub>4</sub><br>mmol kg <sup>-1</sup> | TP<br>mmol kg <sup>-1</sup> | TN<br>mmol kg <sup>-1</sup> | TN : TP<br>mmol kg <sup>-1</sup> | P-PO <sub>4</sub> : TP<br>mmol kg <sup>-1</sup> | TC* : TN<br>mmol kg <sup>-1</sup> | TC* : TN<br>mg kg <sup>-1</sup> |
|--------------|-----------------|-------------|---------------------------|--------------------------------------------|-----------------------------|-----------------------------|----------------------------------|-------------------------------------------------|-----------------------------------|---------------------------------|
| H1           | HT1             | 5           | 46                        | 0.19                                       | 7.66                        | 66.34                       | 8.66                             | 0.03                                            | 31.41                             | 22.17                           |
| H2           | HT2             | 4.6         | 43-49                     | 0.26                                       | 6.51                        | 107.67                      | 16.53                            | 0.04                                            | 17.80                             | 12.57                           |
| H3           | HT3             | 5           | 48                        | 0.19                                       | 6.26                        | 96.91                       | 15.48                            | 0.03                                            | 21.50                             | 15.17                           |
| N1           | NC              | 6.8         | 49-61 (18**)              | 0.21                                       | 5.59                        | 113.19                      | 20.24                            | 0.04                                            | 25.03                             | 17.67                           |
| N2           | NC              | NA          | NA                        | 0.14                                       | 6.01                        | 85.15                       | 14.17                            | 0.02                                            | NA                                | NA                              |
| N3           | NC              | NA          | NA                        | 0.09                                       | 8.49                        | 15.55                       | 1.83                             | 0.01                                            | NA                                | NA                              |
| N4           | NC              | NA          | NA                        | 0.18                                       | 4.37                        | 95.94                       | 21.98                            | 0.04                                            | NA                                | NA                              |
| N5           | NI              | 6.1         | 36-59                     | 0.19                                       | 4.88                        | 89.76                       | 18.40                            | 0.04                                            | 28.32                             | 19.99                           |
| N6           | NR              | 6           | 44-53                     | 0.20                                       | 5.46                        | 110.36                      | 20.20                            | 0.04                                            | 22.65                             | 15.99                           |

\* assuming TC= 0.5 OM

1 **Table S8.** Water content and organic matter calculations by drying of sediments and combustion of dry sediments.

| ID   | site | sedmass<br>g | drymass<br>g | water<br>% | om<br>% |
|------|------|--------------|--------------|------------|---------|
| E1   | E    | 0.186        | NA           | NA         | NA      |
| E2   | E    | 0.136        | NA           | NA         | NA      |
| E3   | E    | 0.206        | NA           | NA         | NA      |
| E4   | E    | 0.249        | NA           | NA         | NA      |
| E5   | E    | 0.251        | 0.131        | 48%        | 4%      |
| E6   | E    | 0.241        | 0.111        | 54%        | 2%      |
| HC1  | HC   | 0.252        | 0.135667     | 46%        | 5%      |
| HC2  | HC   | 0.238        | 0.1295       | 48%        | 5%      |
| HC3  | HC   | 0.147        | 0.071        | 52%        | 4%      |
| HC4  | HC   | 0.207333     | 0.106667     | 50%        | 5%      |
| hc5  | HC   | 0.197        | NA           | 48%        | 4%      |
| hc6  | HC   | 0.216        | NA           | 49%        | 5%      |
| HC7  | HC   | 0.369        | 0.198667     | 46%        | 4%      |
| HC8  | HC   | 0.256        | NA           | 46%        | 5%      |
| HC9  | HC   | 0.244        | NA           | 43%        | 4%      |
| H10  | HC   | 0.284667     | 0.144667     | 49%        | 5%      |
| HT1  | HT   | 0.15         | 0.076        | 49%        | 4%      |
| HT2  | HT   | 0.249        | NA           | NA         | NA      |
| HT3  | HT   | 0.32         | NA           | 58%        | 3%      |
| HT4  | HT   | 0.218        | 0.104        | 52%        | 4%      |
| HT5  | HT   | 0.197        | NA           | 39%        | 3%      |
| HT6  | HT   | 0.265        | NA           | NA         | NA      |
| NC1  | NC   | 0.184667     | 0.0765       | 61%        | 9%      |
| NC2  | NC   | 0.2425       | 0.115        | 56%        | 5%      |
| NC4  | NC   | 0.248        | 0.107        | 62%        | 10%     |
| NC5  | NC   | 0.381        | 0.209667     | 48%        | 6%      |
| NC6  | NC   | 0.35075      | 0.119        | 47%        | 3%      |
| NC7  | NC   | 0.219        | 0.096        | 56%        | 8%      |
| NC8  | NC   | 0.307        | 0.124        | 60%        | NA      |
| NC9  | NC   | 0.20875      | 0.087667     | 56%        | 8%      |
| NC10 | NC   | 0.253        | 0.132        | 48%        | 8%      |
| NI2  | NI   | 0.153        | 0.071        | 54%        | 6%      |
| NI3  | NI   | 0.238        | 0.152        | 36%        | 7%      |
| NI4  | NI   | 0.153        | 0.063        | 59%        | 8%      |
| NI6  | NI   | 0.172        | 0.082        | 52%        | 4%      |
| NI5  | NI   | 0.311        | NA           | NA         | NA      |
| NL1  | NL   | 0.226        | 0.113        | 50%        | NA      |
| NL2  | NL   | 0.164        | NA           | NA         | NA      |
| NL3  | NL   | 0.131        | NA           | NA         | 1%      |
| NL4  | NL   | 0.121        | 0.093        | 24%        | NA      |
| NL5  | NL   | 0.155        | 0.088        | 43%        | NA      |
| NL6  | NL   | 0.167        | 0.1          | 40%        | 3%      |
| NR1  | NR   | 0.939        | 0.497        | 47%        | 7%      |
| NR3  | NR   | 0.19         | 0.091        | 52%        | 7%      |
| NR4  | NR   | 0.224        | 0.126        | 44%        | 4%      |
| NR5  | NR   | 0.458        | NA           | NA         | NA      |
| NR6  | NR   | 0.169        | 0.093        | 45%        | 6%      |

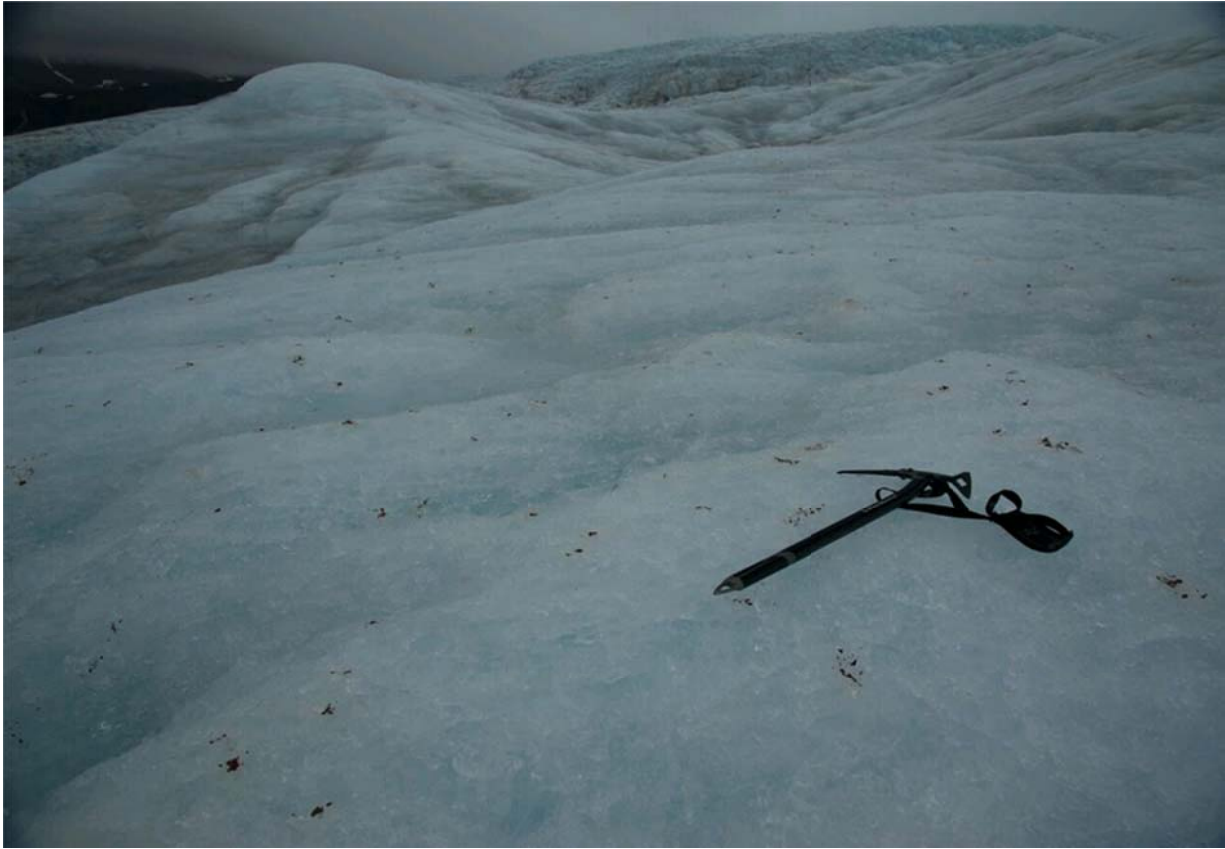

**Figure S2.** Bird guano at the Retrettøya sampling site.



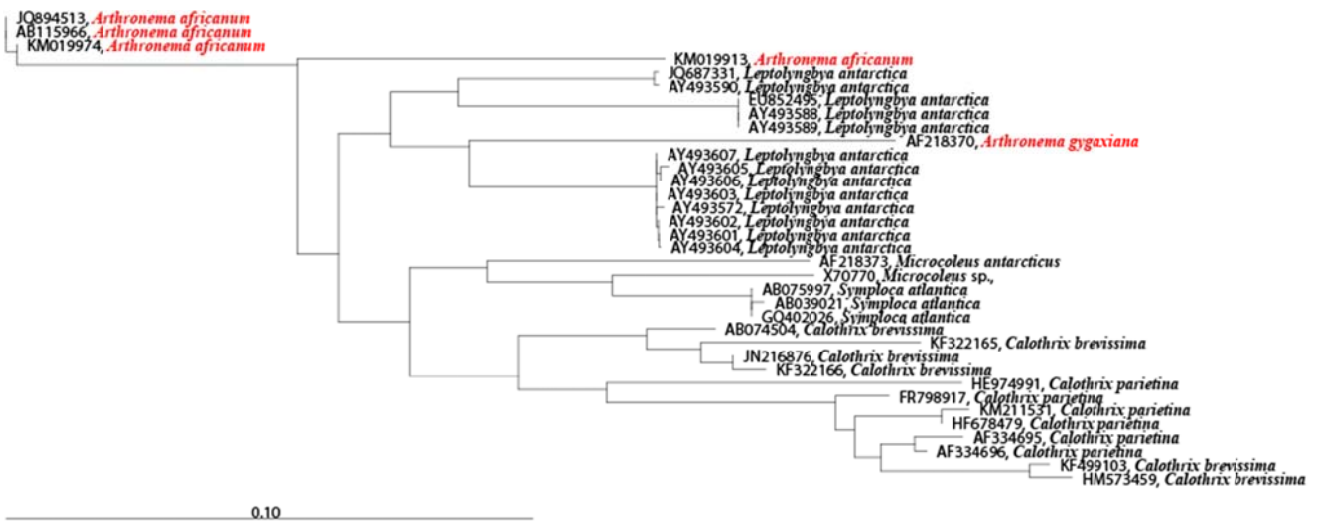

**Figure S3.** ARB phylogenetic tree based on full 16S sequences of published strains (NCBI). The tree is calculated, using the maximum likelihood (Phyml) algorithm. For alignments the implemented SINA alignment was used and the results were checked manually. Given are the ARB accession numbers and the genus and species name.
