# Supplementary material for: Controls on microalgal community structures in cryoconite holes upon high-Arctic glaciers, Svalbard
Source: Copernicus journal article supplement (doi:10.5194/bg-13-659-2016), 2016-02-03
Supplement: Supplementary file 5 [file bg-13-659-2016-supplement.zip]

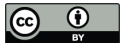

## *Supplement of*

# **Controls on microalgal community structures in cryoconite holes upon high-Arctic glaciers, Svalbard**

**T. R. Vonnahme et al.**

*Correspondence to:* J. Elster (josef.elster@ibot.cas.cz)

- bg-13-659-2016-supplement-title-page.pdf
- Supplement
  - FigureS2.JPG
  - FigureS3.pdf
  - FigureS4.pdf
  - List of supplements.pdf
  - Supplement C\_cryoconite coverage.xlsx
  - Supplement-A\_-16S-reads.xlsx
  - Supplement-B\_tables\_figures.pdf
  - Supplement\_D\_R\_code
    - \* 16S\_Miseq\_2.txt
    - \* ANOVA\_ANOSIm\_sites.R
    - \* Correlation\_grazer\_algae.R
    - \* allspecies.txt
    - \* envaverage2.txt
    - \* median\_sizes.txt
    - \* median\_sizes\_stats.R
    - \* plotcreator\_v4.R
    - \* spec\_sc2.txt
    - \* spec\_sc3.txt

The copyright of individual parts of the supplement might differ from the CC-BY 3.0 licence.
