# Supplementary figures and images for: Controls on microalgal community structures in cryoconite holes upon high-Arctic glaciers, Svalbard
Source: Copernicus journal article supplement (doi:10.5194/bg-13-659-2016), 2016-02-03

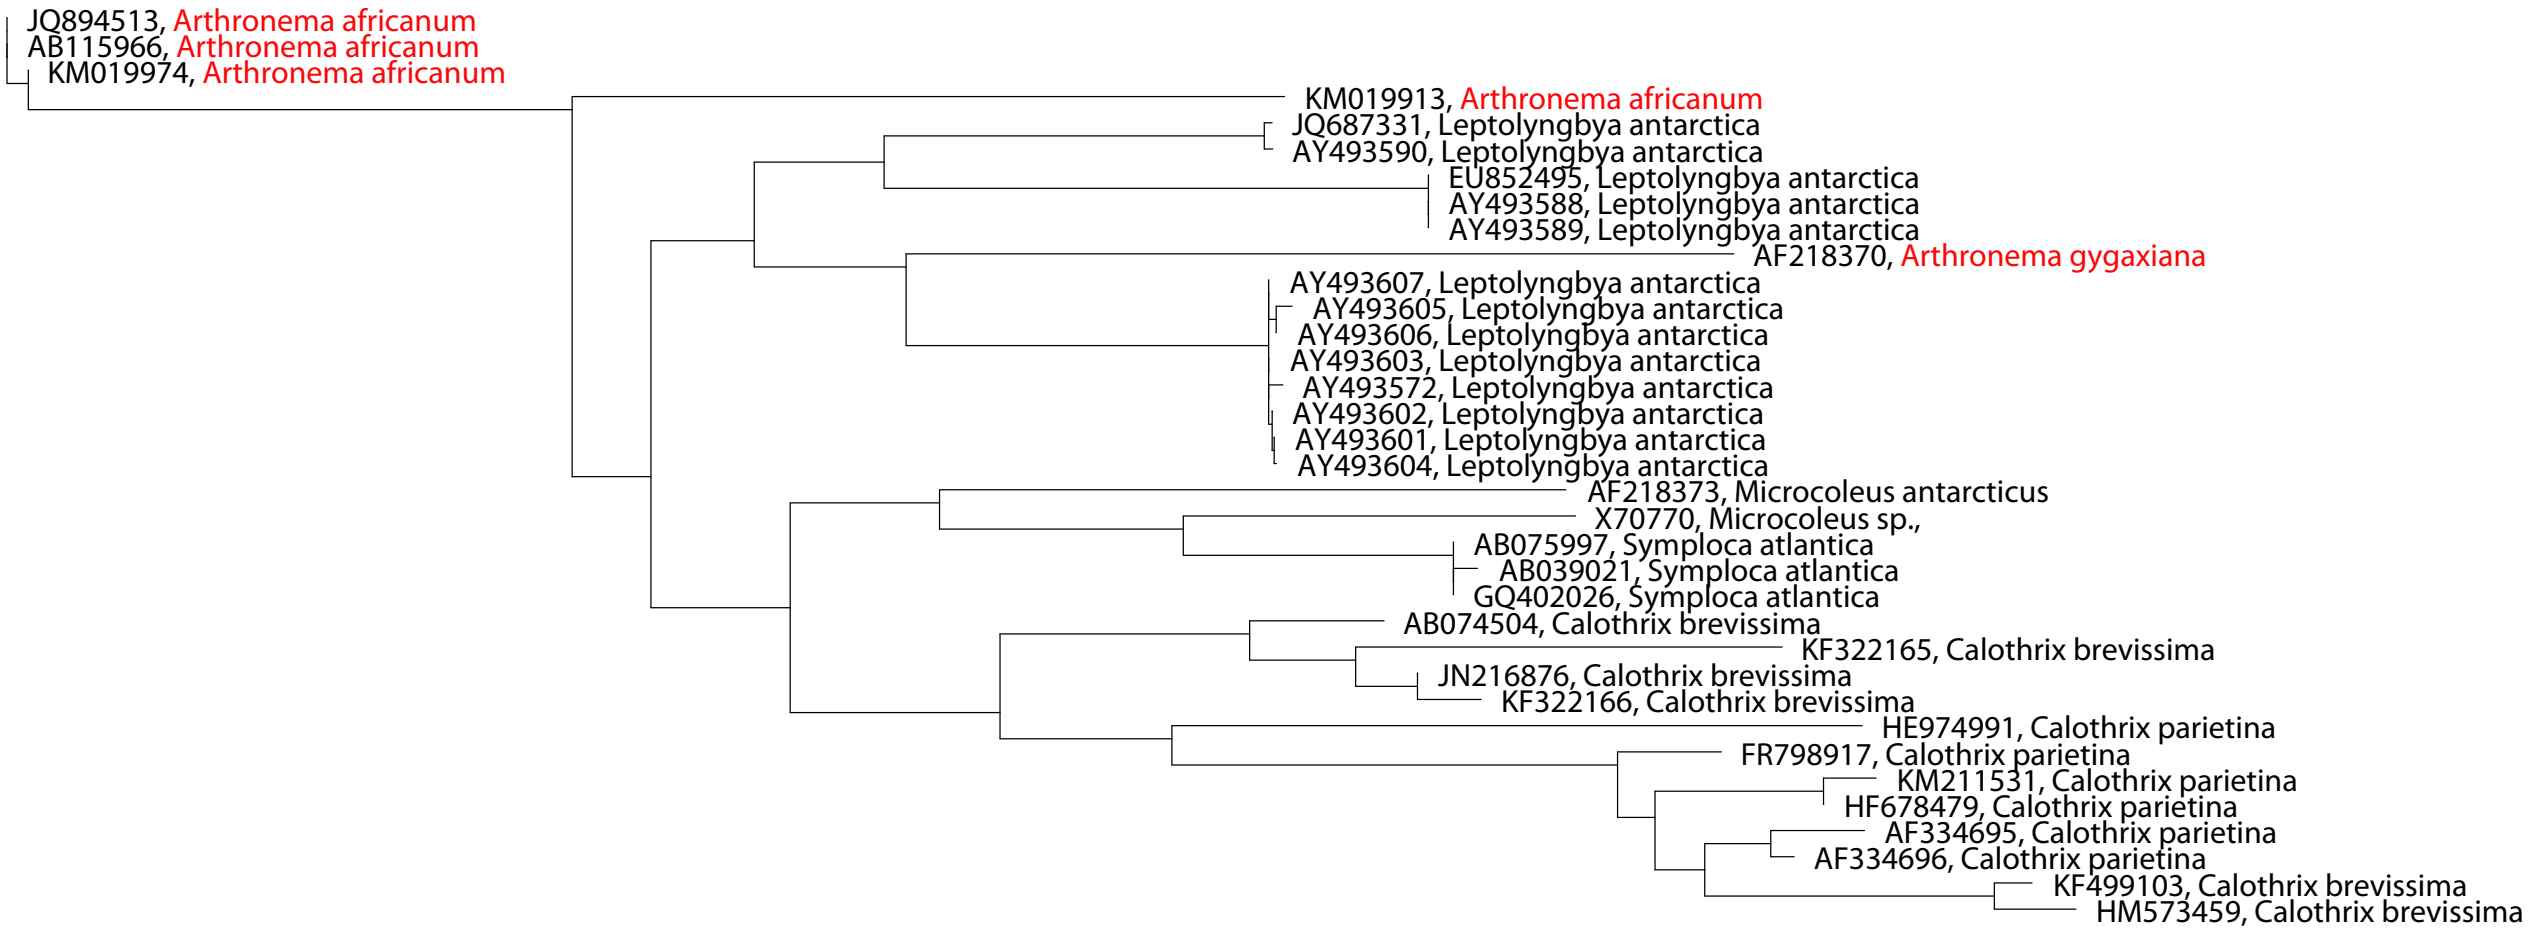

Supplement: Supplementary file 1 [file bg-13-659-2016-supplement.zip]

water depth (cm)

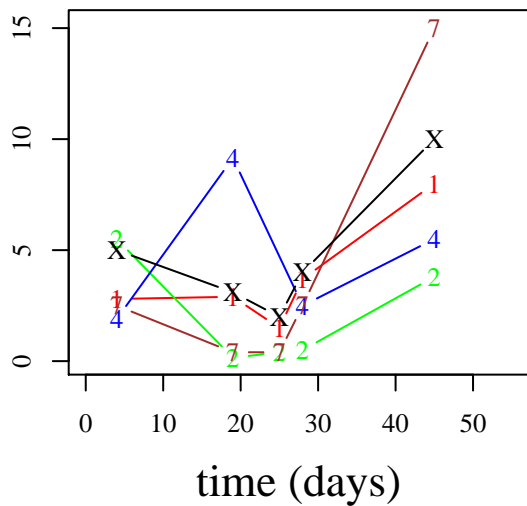

water depth (cm)

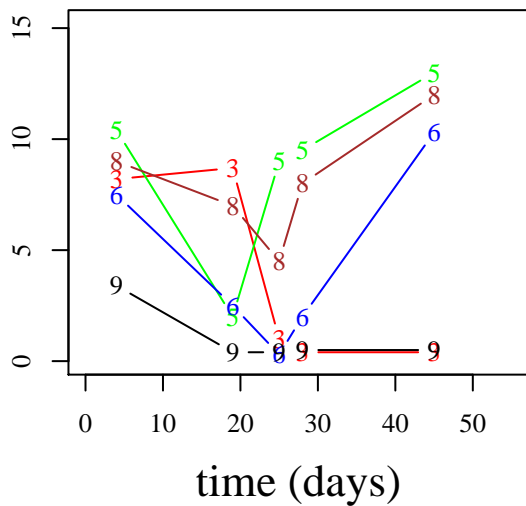

water depth (cm)

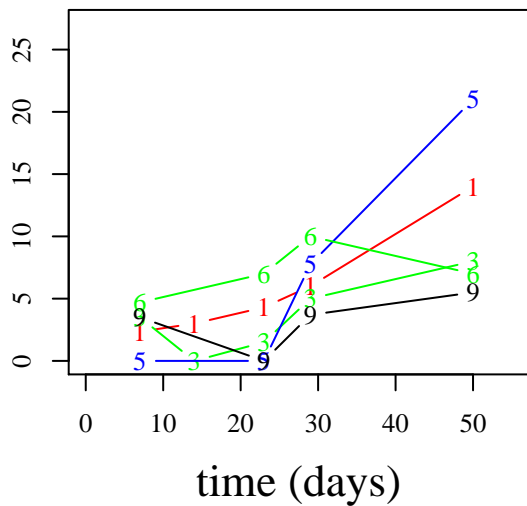

water depth (cm)

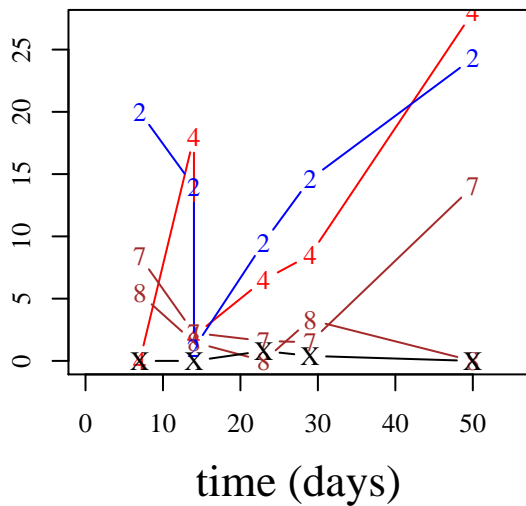

Supplement: Supplementary file 3 [file bg-13-659-2016-supplement.zip]
